# Supplementary material
Source: Springer Nature journal article supplement (https://www.springermedizin.de/resource/supplementary/12889_2011_4680_MOESM2_ESM.pdf/9493744)

(a) *Farmers*

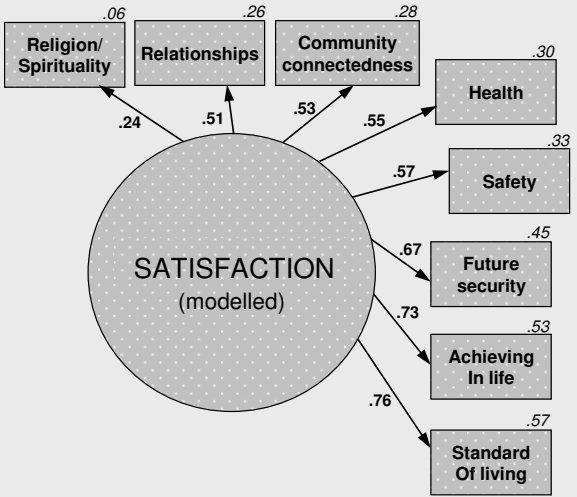

(b) *General Community*

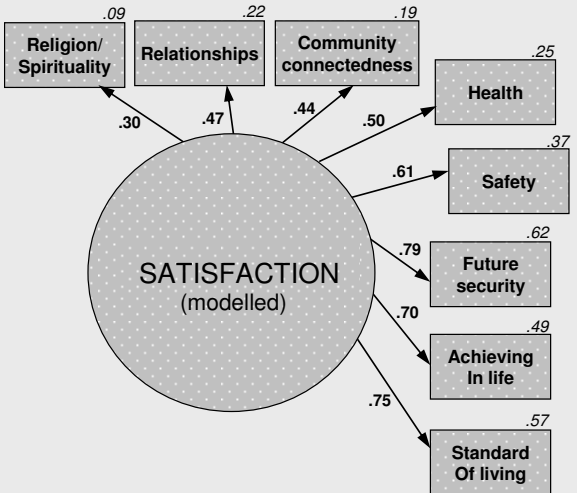

Supplement: MOESM2 [file 9493744]
